# Supplementary material for: A sustainable lignocellulosic biodiesel production integrating solar- and bio-power generation
Source: Royal Society of Chemistry journal article supplement (doi:10.1039/c6gc00998k), 2016-01-01
Supplement: c6gc00998k1.xlsx [file c6gc00998k1.xlsx]

## Sheet: MassFlow
Basic mass information
Feedstock and lipid for 20 million gallon biodiesel	value	unit	source
total biodiesel	10000000	gal/yr	assumed for this study
total biodiesel	33610000	kg/yr	calculated
Fungal lipid	35021620	kg/yr	calculated
Corn stover	5.07152e+08	kg/yr	calculated
PARAMETERS
Conversion factors	value	unit	source
biodiesel density	3.361	kg/gal	Huo et al. 2008
Lipid per biodiesel	1.042	kg lipid/kg biodiesel	U.S. Soybean board
Fungal lipid per corn stover	0.0690554	kg lipid/kg corn stover	Ruan et al. 2014

## Sheet: Collection&Transportation
1. Corn stover collection and transportation
MASS BALANCE (annual base)						MASS BALANCE (unit kg biodiesel)
mass input	value	unit				mass input	value	unit
N fertilizer	4.46294e+06	kg/yr				N fertilizer	0.132786	kg/kg
P fertilizer	304291	kg/yr				P fertilizer	0.00905359	kg/kg
K fertilizer	3.6515e+06	kg/yr				K fertilizer	0.108643	kg/kg
Diesel (harvest)	2.28908e+06	kg/yr				Diesel (harvest)	0.0681072	kg/kg
Diesel (transport)	610563	kg/yr				Diesel (transport)	0.0181661	kg/kg
mass output	value	unit				mass output	value	unit
Corn stover	5.07152e+08	kg/yr				Corn stover	15.0893	kg/kg
ENERGY BALANCE (annual base)						ENERGY BALANCE (unit kg biodiesel)
energy input	value	unit				energy input	value	unit
N fertilizer	2.12882e+08	MJ/yr				N fertilizer	6.33389	MJ/kg	fossil fuel energy equivalent for fertilizer production
P fertilizer	4.06229e+06	MJ/yr				P fertilizer	0.120865	MJ/kg	fossil fuel energy equivalent for fertilizer production
K fertilizer	2.95406e+07	MJ/yr				K fertilizer	0.878923	MJ/kg	fossil fuel energy equivalent for fertilizer production
Diesel (harvest)	1.24634e+08	MJ/yr				Diesel (harvest)	3.70824	MJ/kg
Diesel (transport)	3.32434e+07	MJ/yr				Diesel (transport)	0.989092	MJ/kg
Electricity energy	0	MJ/yr				Electricity energy	0	MJ/kg
Thermal energy	0	MJ/yr				Thermal energy	0	MJ/kg
Fossil fuel energy	4.04362e+08	MJ/yr				Fossil fuel energy	12.031	MJ/kg
total	4.04362e+08	MJ/yr				total	12.031	MJ/kg
PARAMETERS
Mass Parameter	value	unit	source
Nitrogen (N)	8.8	kg/ (t dry corn stover)	Sheehan et al., 2004
Phosphorus (P)	0.6	kg/ (t dry corn stover)	Sheehan et al., 2004
Potassium (K)	7.2	kg/ (t dry corn stover)	Sheehan et al, 2004
Energy Parameter	value	unit	source
Nitrogen	47.7	MJ/kg	GREET 1.8c
Phosphorus	13.35	MJ/kg	GREET 1.8c
Potassium	8.09	MJ/kg	GREET 1.8c
Diesel	45.3	MJ/L	GREET 1.8c
Fossil Fuel Parameter	value	unit	source
diesel for harvest	5.425	L/ (ton corn stover)	Morey et al., 2010
diesel for transport	1.447	L/ (ton corn stover)	Morey et al., 2010
diesel density	0.832	kg/L	known value
corn stover property	value	unit	source
specific heat capacity	2	kJ/(kg*K)	Kaliyan et al., 2009
Cellulose	36.2	% (w/w)	Ruan et al., 2014
Xylan	22	% (w/w)	Ruan et al., 2014
Lignin	18.6	% (w/w)	Ruan et al., 2014

## Sheet: Pretreatment&Hydrolysis
2. Corn stover pretreatment and enzymatic hydrolysis
MASS BALANCE (annual base)						MASS BALANCE (Unit kg biodiesel)
mass input	value	unit				mass input	value	unit
Sulfuric acid	5.07152e+07	kg/yr				Sulfuric acid	1.50893	kg/kg
Alkali	5.07152e+07	kg/yr				Alkali	1.50893	kg/kg
Water	4.4478e+09	kg/yr				Water	132.336	kg/kg
Enzyme	1.12994e+07	kg/yr				Enzyme	0.33619	kg/kg
mass output	value	unit				mass output	value	unit
Hydrolysate	4.73832e+09	kg/yr				Hydrolysate	140.979	kg/kg
Hydrolysis residue (wet)	3.29366e+08	kg/yr				Hydrolysis residue (wet)	9.79963	kg/kg
ENERGY BALANCE (annual base)						ENERGY BALANCE (Unit kg biodiesel)
energy input	value	unit				energy input	value	unit
Thermal energy for pretreatment	9.77789e+08	MJ/yr				Thermal energy for pretreatment	29.0922	MJ/kg
Electricity energy for grind corn stover	9.12874e+07	MJ/yr				Electricity energy for grind corn stover	2.71608	MJ/kg
Electricity energy for pretreatment	1.88397e+06	MJ/yr	For agitation			Electricity energy for pretreatment	0.0560539	MJ/kg	For agitation
Electricity energy for enzymatic hydrolysis	1.31878e+08	MJ/yr	For agitation			Electricity energy for enzymatic hydrolysis	3.92377	MJ/kg	For agitation
Electricity energy for filter	3.65109e+07	MJ/yr				Electricity energy for filter	1.04252	MJ/kg
Total thermal energy	9.77789e+08	MJ/yr				Total thermal energy	29.0922	MJ/kg
Total electricity energy	2.6156e+08	MJ/yr				Total electricity energy	7.73843	MJ/kg
total energy input	1.23935e+09	MJ/yr				total energy input	36.8306	MJ/kg
PARAMETERS
Pretreatment conditions	value	unit	source
Solid loading	10	%(w/w)	Ruan et al., 2014
Sulfuric acid	2	%(w/w)	Ruan et al., 2014
Alkali	2	%(w/w)	Ruan et al., 2014
Initial temperature	15	C	groundwater temperature at Meade County, Kansas
Reaction temperature	130	C	Ruan et al., 2014
Reaction time	1	hour	Ruan et al., 2014
Energy to grind corn stover	0.18	MJ/kg corn stover	Zhu et al., 2012
Specific heat capacity of slurry	3.964	kJ/(kg*K)
Enzymatic hydrolysis conditions	value	unit	source
Accellerase 1500	21.2	g/kg corn stover	Ruan et al., 2014
Accellerase XY	1.08	g/kg corn stover	Ruan et al., 2014
Accellerase 1500 activity	0.0852	g protein/g enzyme	Ruan et al., 2014
Accellerase XY activity	0.0436	g protein/g enzyme	Ruan et al., 2014
Reation temperature	50	C	Ruan et al., 2014
Reaction time	70	hour	Ruan et al., 2014
Final hydrolysate temperature	25	C	the fermentation temperature
Specific heat capacity of solution	4.18	kJ/(kg*K)
Overall sugar yield	74.2	% raw corn stover	Ruan et al., 2014
Characteristics of hydrolysate	value	unit	source
Glucose	30.43	g/kg hydrolysate	Ruan et al., 2014
Xylose	19.04	g/kg hydrolysate	Ruan et al., 2014
Acetate	4.48	g/kg hydrolysate	Ruan et al., 2014
Characteristics of hydrolysis residue	value	unit	source
total dry solid in the residue	35.8	% (w/w)	Sievers, 2014
Lignin content	80	% dry solid	Unpublished data
	.
Agitation conditions for 100 m3 reactor (a)	Value	Unit	source
Np (unaerated power #)	0.35		Doran, 2013
D (Impeller diameter)	1.65	m	Doran, 2013
ρ (liquid density)	1000	kg/m3	Doran, 2013
N (rotation speed) (b)	1.5	rev/s	Doran, 2013
global efficiency for agitation	0.7		Alves et al., 1996
μ (dynamic viscosity)	0.000282	N s/m2	at 130 C
μ (dynamic viscosity)	0.000547	N s/m2	at 50 C
calculations
Pg (agitation power)	14.4465	kW/200m3	Doran, 2013
Pg (agitation power for pretreatment)	2.60036	kJ/kg dry corn stover
Pg (agitation power for hydrolysis)	182.025	kJ/kg dry corn stover
heat (pretreatment)	4558.6	kJ/kg dry corn stover
heat (pretreatment recovery)	3171.2	kJ/kg dry corn stover
heat (enzymatic hydrolysis recovery)	1045	kJ/kg dry corn stover
Notes
(a) the geometry of both pretreatmnet and hydrolysis reactors is 5.0 meter in diameter and 12 meter tall. The effevtive level is at 10 m for 200 m3 effective volume. The impeller is propeller.
(b) the rotation speed is 90 rpm.
Pressure filter	Value	Unit	source
Unit size (filter area)	168	m2	Sievers, 2014
Unit number for 10 million gallon biodiesel production	2	unit
Unit capacity	20	kg dry solids/hr/m2 filter area	Sievers, 2014
Unit power demand	289	kW/unit	Sievers, 2014
Sugar recovery	99	%	Sievers, 2014
calculations
Energy consumption of the pressure filter	309.643	kJ/kg dry residue

## Sheet: LigninProcessing
3. Lignin processing
MASS BALANCE (annual base)						MASS BALANCE (Unit kg biodiesel)
mass input	value	unit				mass input	value	unit
Wet hydrolysis residue	3.29366e+08	kg/yr				Wet hydrolyssi residue	9.79963	kg/kg
mass output	value	unit				mass output	value	unit
dry lignin rich residue	1.17913e+08	kg/yr				dry lignin rich residue	3.50827	kg/kg
ENERGY BALANCE (annual base)						ENERGY BALANCE (Unit kg biodiesel)
energy input	value	unit				energy input	value	unit
Thermal energy for drying	5.16121e+08	MJ/yr				Thermal energy for drying	15.3562	MJ/kg
Electricity energy for drying	1.03224e+07	MJ/yr				Electricity energy for drying	0.307124	MJ/kg
Total thermal energy	5.16121e+08	MJ/yr				Total thermal energy	15.3562	MJ/kg
Total electricity energy	1.03224e+07	MJ/yr				Total electricity energy	0.307124	MJ/kg
total energy input	5.26444e+08	MJ/yr				total energy input	15.6633	MJ/kg
energy product	value	unit				energy product	value	unit
lignin energy	2.30166e+09	MJ/yr				lignine energy	68.4814	MJ/kg
PARAMETERS
Lignin drying conditions	value	unit	source
Initial hydrolysis residue temperature	50	C	assumption
Drying temperature	75	C	assumption
Specific heat capacity of water	4.18	kJ/(kg*K)
Specific heat capacity of dry lignin rich residue	1.1	kJ/(kg*K)
Latent heat of water at 75C	2321	kJ/kg	Singh, 2009
moisture content of the wet hydrolysis residue	64.2	% (w/w)
moisture content of dry lignin rich residue	0	% (w/w)
Lignin content	0.8	kg/kg dry residue
Lignin LHV	24400	kJ/kg lignin	Tomani, P., 2009
Prasitic electricity energy	2	% total thermal energy	Mani et al., 2010
Characteristics of hydrolysis residue	value	unit	source
Total dry solid in the wet residue	35.8	weight fraction of the wet residue	Sievers et al., 2014
Lignin	80	% dry solid	Unpublished data
Soluable lignin in the pretreatment process	0.13	fraction of the original lignin content	Chen et al., 2009

## Sheet: FungalLipidFermentation
4. Fungal lipid fermentation
MASS BALANCE (annual base)						MASS BALANCE (Unit kg biodiesel)
mass input	value	unit				mass input	value	unit
Hydrolysate	4.73832e+09	kg/yr				Hydrolysate	140.979	kg/kg
air	3.52978e+07	kg/yr				air	1.05022	kg/kg
mass output	value	unit				mass output	value	unit
Fungal biomass (wet)	4.71672e+08	kg/yr				Fungal biomass (wet)	14.0337	kg/kg
fermentation liquid effluent	4.26665e+09	kg/yr				Fermentation liquid effluent	126.946	kg/kg
ENERGY BALANCE (annual base)						ENERGY BALANCE (Unit kg biodiesel)
energy input	value	unit				energy input	value	unit
Electricity energy for aeration	7.0447e+09	MJ/yr				Electricity energy for aeration	209.601	MJ/kg
Electricity energy for agitation	1.2169e+09	MJ/yr				Electricity energy for agitation	36.2065	MJ/kg
Electricity energy for cooling	8.88371e+08	MJ/yr				Electricity energy for cooling	26.4318	MJ/kg
Electricity energy for biomass dewatering	3.65124e+07	MJ/yr				Electricity energy for biomass dewatering	1.08636	MJ/kg
Total thermal energy	0	MJ/yr				Total thermal energy	0	MJ/kg
Total electricity energy	9.18649e+09	MJ/yr				Total electricity energy	273.326	MJ/kg
total energy input	9.18649e+09	MJ/yr				total energy input	273.326	MJ/kg
PARAMETERS
Fermentation conditions	value	unit	source
Fermentation time	96	hour	Ruan et al., 2014
Fermentation temperature	25	C	Ruan et al., 2014
Fermentor size	200	m3
Oxygen consumption	1	mol/kg dry fungal biomass/hr	unpublished data
Aeration	1	vvm	Ruan et al., 2014
Agitation	180	rpm	unpublished data
Global efficiency for agitation	0.7		Alves et al., 1996
Global efficiency for compressor	0.5		assumed
Fungal biomass	value	unit	source
dry matter	25	%	unpublished data
Fungal biomass yield	0.024886	kg dry fungal biomass/kg hydrolysate	Ruan et al., 2014
Aeration conditions for 200 m3 fermentor (a)	value	unit	source
Q (air flow)	3.33333	m3/s
γ for air compression	1.4		Alves et al. 1996
calculations
α	129058		Alves et al. 1996
Pc (compression power)	860.389	kW/200m3	Alves et al. 1996
Agitation conditions for 200 m3 fermentor (a)	Value	Unit	source
P0 (atm P)	100000	N/m2	Alves et al. 1996
P1 (Compressor exit pressure)	300000	N/m2	Alves et al. 1996
P2 (Pressure at the bottom of fermentor)	261800	N/m2	Calculated based on the size of the fermentor
Np (power #)	0.35		Doran, 2013
D (Impeller diameter) (c)	1.65	m	Doran, 2013
ρ (liquid density)	1000	kg/m3	Doran, 2013
N (rotation speed) (b)	3	rev/s	Doran, 2013
calculations
Pg (agitation power)	148.623	kW/200m3	Alves et al. 1996
Cooling for 200 m3 fermentor (a)	Value	Unit	source
chiller efficiency	0.6	kW/ton	kw electricity needed to remove 12,661 kJ heat per hour
Energy released per mol oxygen consumed	460	kJ/mol oxygen comsumed	Doran, 2013
Heat of fermentation	44160	kJ/kg dry fungal biomass	calculated
calculations
Pr (cooling)	108.499	kW/200m3
Notes
(a) the geometry of the fermetor is 5.0 meter in diameter and 12 meter tall. The effevtive level is at 10 m for 200 m3 effective volume. The impeller is propeller.
(b) the agitation speed is 180 rpm
(c) the ratio of the propeller diameter to the fermentor diameter is 0.33.
Pressure filter	Value	Unit	source
Unit size (filter area)	168	m2	Sievers, 2014
Unit number for 10 million gallon biodiesel production	1	unit
Unit capacity	20	kg dry solids/hr/m2 filter area	Sievers, 2014
Unit power demand	289	kW/unit	Sievers, 2014
calculations
Energy consumption of the pressure filter	309.643	kJ/kg dry residue

## Sheet: FungalBiomassDrying
5. Fungal biomass drying
MASS BALANCE (annual base)						MASS BALANCE (Unit kg biodiesel)
mass input	value	unit				mass input	value	unit
Wet fungal biomass	4.71672e+08	kg/yr				Wet fungal biomass	14.0337	kg/kg
mass output	value	unit				mass output	value	unit
Dry fungal biomass	1.17918e+08	kg/yr				Dry fungal biomass	3.50842	kg/kg
ENERGY BALANCE (annual base)						ENERGY BALANCE (Unit kg biodiesel)
energy input	value	unit				energy input	value	unit
Thermal energy for drying	9.17991e+08	MJ/yr				Thermal energy for drying	27.313	MJ/kg
Electricity energy for drying	1.83598e+07	MJ/yr				Electricity energy for drying	0.546261	MJ/kg
Total thermal energy	9.17991e+08	MJ/yr				Total thermal energy	27.313	MJ/kg
Total electricity energy	1.83598e+07	MJ/yr				Total electricity energy	0.546261	MJ/kg
total energy input	9.36351e+08	MJ/yr				total energy input	27.8593	MJ/kg
PARAMETERS
Lignin drying conditions	value	unit	source
Initial fungal biomass temperature	25	C	assumption
Drying temperature	100	C	assumption
Lipid content in the dry fungal biomass	29.7	% (w/w)	unpublished data
Specific heat capacity of water	4.18	kJ/(kg*K)
Specific heat capacity of dry fungal biomass	1.5	kJ/(kg*K)
Latent heat of water at 100C	2244	kJ/kg	Singh, 2009
Prasitic electricity energy	2	% total thermal energy	Mani et al., 2010
Fungal biomass	value	unit	source
dry matter	25	%	unpublished data

## Sheet: LipidExtractTransesterification
6. Lipid extraction and transesterification
EXTRACTION MASS BALANCE (annual base)						EXTRACTION MASS BALANCE (Unit kg biodiesel)
mass input	value	unit				mass input	value	unit
Dry fungal biomass	1.17918e+08	kg/yr				Dry fungal biomass	3.50842	kg/kg
Hexane	103664	kg/yr				Hexane	0.00308432	kg/kg
Water	8.92001e+07	kg/yr				Water	2.65397	kg/kg
mass output	value	unit				mass output	value	unit
Fungal lipid	35021620	kg/yr				Fungal lipid	1.042	kg/kg
Fungal biomass residue	8.28963e+07	kg/yr				Fungal biomass residue	2.46642	kg/kg
wastewater	8.92001e+07	kg/yr				wastewater	2.65397	kg/kg
EXTRACTION ENERGY BALANCE (annual base)						EXTRACTION ENERGY BALANCE (Unit kg biodiesel)
energy input	value	unit				energy input	value	unit
Thermal energy for extraction	2.20342e+08	MJ/yr				Thermal energy for extraction	6.55585	MJ/kg
Electricity energy for extraction	3.64365e+07	MJ/yr				Electricity energy for extraction	1.0841	MJ/kg
Total thermal energy	2.20342e+08	MJ/yr				Total thermal energy	6.55585	MJ/kg
Total electricity energy	3.64365e+07	MJ/yr				Total electricity energy	1.0841	MJ/kg
total energy input	2.56779e+08	MJ/yr				total energy input	7.63994	MJ/kg
TRANSESTERIFICATION MASS BALANCE (annual base)						TRANSESTERIFICATION MASS BALANCE (Unit kg biodiesel)
mass input	value	unit				mass input	value	unit
Fungal lipid	35021620	kg/yr				Fungal lipid	1.042	kg/kg
Methanol	3098842	kg/yr				Methanol	0.0922	kg/kg
Water		kg/yr				Water	0	kg/kg
mass output	value	unit				mass output	value	unit
Biodiesel	33610000	kg/yr				Biodiesel	1	kg/kg
Glycerol	4026478	kg/yr				Glycerol	0.1198	kg/kg
Wastewater	5243160	kg/yr				wastewater	0.156	kg/kg
TRANSESTERIFICATION ENERGY BALANCE (annual base)						TRANSESTERIFICATION ENERGY BALANCE (Unit kg biodiesel)
energy input	value	unit				energy input	value	unit
Thermal energy	2.90995e+06	MJ/yr				Thermal energy	0.08658	MJ/kg
Electricity energy	1.84889e+06	MJ/yr				Electricity energy	0.05501	MJ/kg
Total thermal energy	2.90995e+06	MJ/yr				Total thermal energy	0.08658	MJ/kg
Total electricity energy	1.84889e+06	MJ/yr				Total electricity energy	0.05501	MJ/kg
total energy input	4.75884e+06	MJ/yr				total energy input	0.14159	MJ/kg
energy product	value	unit				energy product	value	unit
Glycerol	64423648	MJ/yr				Glycerol	1.9168	MJ/kg
PARAMETERS
Extraction conditions	value	unit	source
Hexane	2.96	kg/1000 kg fungal lipid	Omni Tech International
Water	2547	kg/1000 kg fungal lipid	Omni Tech International
Electricity energy	1040.4	kJ/kg fungal lipid	Omni Tech International
Thermal energy (steam)	6291.6	kJ/kg fungal lipid	Omni Tech International
Transesterification conditions	value	unit	source
Methanol	0.0922	kg/kg biodiesel	Omni Tech International
Glycerol	0.1198	kg/kg biodiesel	Omni Tech International
wastewater	0.156	kg/kg biodiesel	Omni Tech International
electricity energy	55.01	kJ/kg biodiesel	Omni Tech International
thermal energy	86.58	kJ/kg biodiesel	Omni Tech International
Other	value	unit	source
Glycerol low heating value	16	MJ/kg glycerol

## Sheet: WaterTreatment
7. Water treatment
ANAEROBIC MASS BALANCE (annual base)						ANAEROBIC MASS BALANCE (Unit kg biodiesel)
mass input	value	unit				mass input	value	unit
Wastewater (from fermentation and lipid extraction)	4.36109e+09	kg/yr				Wastewater (from fermentation and liquid extraction)	129.756	kg/kg
mass output	value	unit				mass output	value	unit
Anaerobic digestion effluent	4.27466e+09	kg/yr				Anaerobic digestion effluent	127.184	kg/kg
Methane	3.07021e+07	kg/yr				Methane	0.91348	kg/kg
CO2 (66%v/v of methane)	5.57243e+07	kg/yr				CO2 (66%v/v of methane)	1.59114	kg/kg
ANAEROBIC ENERGY BALANCE (annual base)						ANAEROBIC ENERGY BALANCE (Unit kg biodiesel)
energy input	value	unit				energy input	value	unit
Thermal energy for digestion	1.82294e+08	MJ/yr				Thermal energy for digestion	5.42379	MJ/kg
Electricity energy for digestion	3.72028e+06	MJ/yr				Electricity energy for digestion	0.11069	MJ/kg
Total thermal energy	1.82294e+08	MJ/yr				Total thermal energy	5.42379	MJ/kg
Total electricity energy	3.72028e+06	MJ/yr				Total electricity energy	0.11069	MJ/kg
total energy input	1.86014e+08	MJ/yr				total energy input	5.53448	MJ/kg
energy product	value	unit				energy product	value	unit
Methane energy	1.5351e+09	MJ/yr				Methane energy	45.674	MJ/kg
AEROBIC MASS BALANCE (annual base)						AEROBIC MASS BALANCE (Unit kg biodiesel)
mass input	value	unit				mass input	value	unit
Anaerobic digestion effluent	4.27466e+09	kg/yr				Anaerobic digestion effluent	127.184	kg/kg
mass output	value	unit				mass output	value	unit
reclaimed water	3.8472e+09	kg/yr				reclaimed water	114.466	kg/kg
AEROBIC ENERGY BALANCE (annual base)						AEROBIC ENERGY BALANCE (Unit kg biodiesel)
energy input	value	unit				energy input	value	unit
Electricity energy	4.87739e+06	MJ/yr				Electricity energy	0.145117	MJ/kg
Total electricity energy	4.87739e+06	MJ/yr				Total electricity energy	0.145117	MJ/kg
total energy input	4.87739e+06	MJ/yr				total energy input	0.145117	MJ/kg
RO MASS BALANCE (annual base)						RO MASS BALANCE (Unit kg biodiesel)
mass input	value	unit				mass input	value	unit
reclaimed water	3.8472e+09	kg/yr				Anaerobic digestion effluent	114.466	kg/kg
mass output	value	unit				mass output	value	unit
Pure water	3.07776e+09	kg/yr				reclaimed water	91.5727	kg/kg
Brine water (9% Na2SO4)	7.69439e+08	kg/yr				Brine water (9% Na2SO4)	22.8932	kg/kg
RO ENERGY BALANCE (annual base)						RO ENERGY BALANCE (Unit kg biodiesel)
energy input	value	unit				energy input	value	unit
Electricity energy	4.63972e+07	MJ/yr				Electricity energy	1.38046	MJ/kg
Total electricity energy	4.63972e+07	MJ/yr				Total electricity energy	1.38046	MJ/kg
total energy input	4.63972e+07	MJ/yr				total energy input	1.38046	MJ/kg
LIME TREATMENT MASS BALANCE (annual base)						LIME TREATMENT MASS BALANCE (Unit kg biodiesel)
mass input	value	unit				mass input	value	unit
Brine water (9% Na2SO4)	7.69439e+08	kg/yr				Brine water (9% Na2SO4)	22.8932	kg/kg
Lime	3.60098e+07	kg/yr				Lime	1.0714	kg/kg
mass output	value	unit				mass output	value	unit
NaOH solution (5% NaOH)	4.73051e+08	kg/yr				NaOH solution (5% NaOH)	14.0747	kg/kg
wet CaSO4 production	3.32398e+08	kg/yr				wet CaSO4	9.88985	kg/kg
PARAMETERS
Anaerobic digestion operations	value	unit	source
COD of the wastewater	35.2	g COD/kg wastewater	measured
COD reduction during the AD	80	%	lab data
Methane production per COD reduction	0.25	g/g COD reduced	measured
LHV of methane	50	MJ/kg
temperature of the wastewater	25	C
temperature of anaerobic digestion	35	C
Parasticic electricity energy for AD	2	% total energy	assumption
thermal energy required for AD	41.8	kJ/kg wastewater
Aerobic treatment operations	value	unit	source
aerobic treatment electricity requirement	1141	kJ/1000 kg	W.E. Federation
water recovery yield	90	%
Reverse osmosis operations	value	unit	source
electricity requirement	12060	kJ/1000 kg reclaimed water	Gottberg, et al., 2012
water recovery yield	80	%	Gottberg, et al., 2012
hydrated lime operations	value	unit	source
Na2SO4 in brine water	0.09	kg/kg brine water
hydrated lime amount	0.52	kg/kg Na2SO4	Gottberg, et al., 2012
CaSO4 production	0.96	kg/kg Na2SO4
Dry matter of CaSO4	20	%

## Sheet: OverallEnergyBalance
Overall Energy Balance (MJ/kg biodiesel)
	Input	production
Fossil fuel energy
1. Corn stover collection and transportation	12.031
2. Corn stover pretreatment and enzymatic hydrolysis
3. Lignin processing
4. Fungal lipid fermentation
5. Fungal biomass drying
6. Lipid extraction and transesterification		37.5
7. Water treatment
Total	12.031	37.5
Thermal energy
1. Corn stover collection and transportation
2. Corn stover pretreatment and enzymatic hydrolysis	29.0922
3. Lignin processing	15.3562	51.361
4. Fungal lipid fermentation	0
5. Fungal biomass drying	27.313
6. Lipid extraction and transesterification	6.64243	1.4376
7. Water treatment	5.42379	34.2555
Total	83.8276	87.0542
Electricity energy
1. Corn stover collection and transportation
2. Corn stover pretreatment and enzymatic hydrolysis	7.73843
3. Lignin processing	0.307124	13.6963
4. Fungal lipid fermentation	273.326
5. Fungal biomass drying	0.546261
6. Lipid extraction and transesterification	1.13911	0.38336
7. Water treatment	1.63626	9.1348
Total	284.693	23.2144
overall energy balance	380.552	147.769
